# Supplementary material for: Evaluation of β-Catenin Inhibition of Axitinib and Nitazoxanide in Human Monocyte-Derived Dendritic Cells
Source: MDPI journal article supplement (doi:10.3390/biomedicines9080949), 2021-08-03
Supplement: s1 [file s1]

# Supplementary Materials

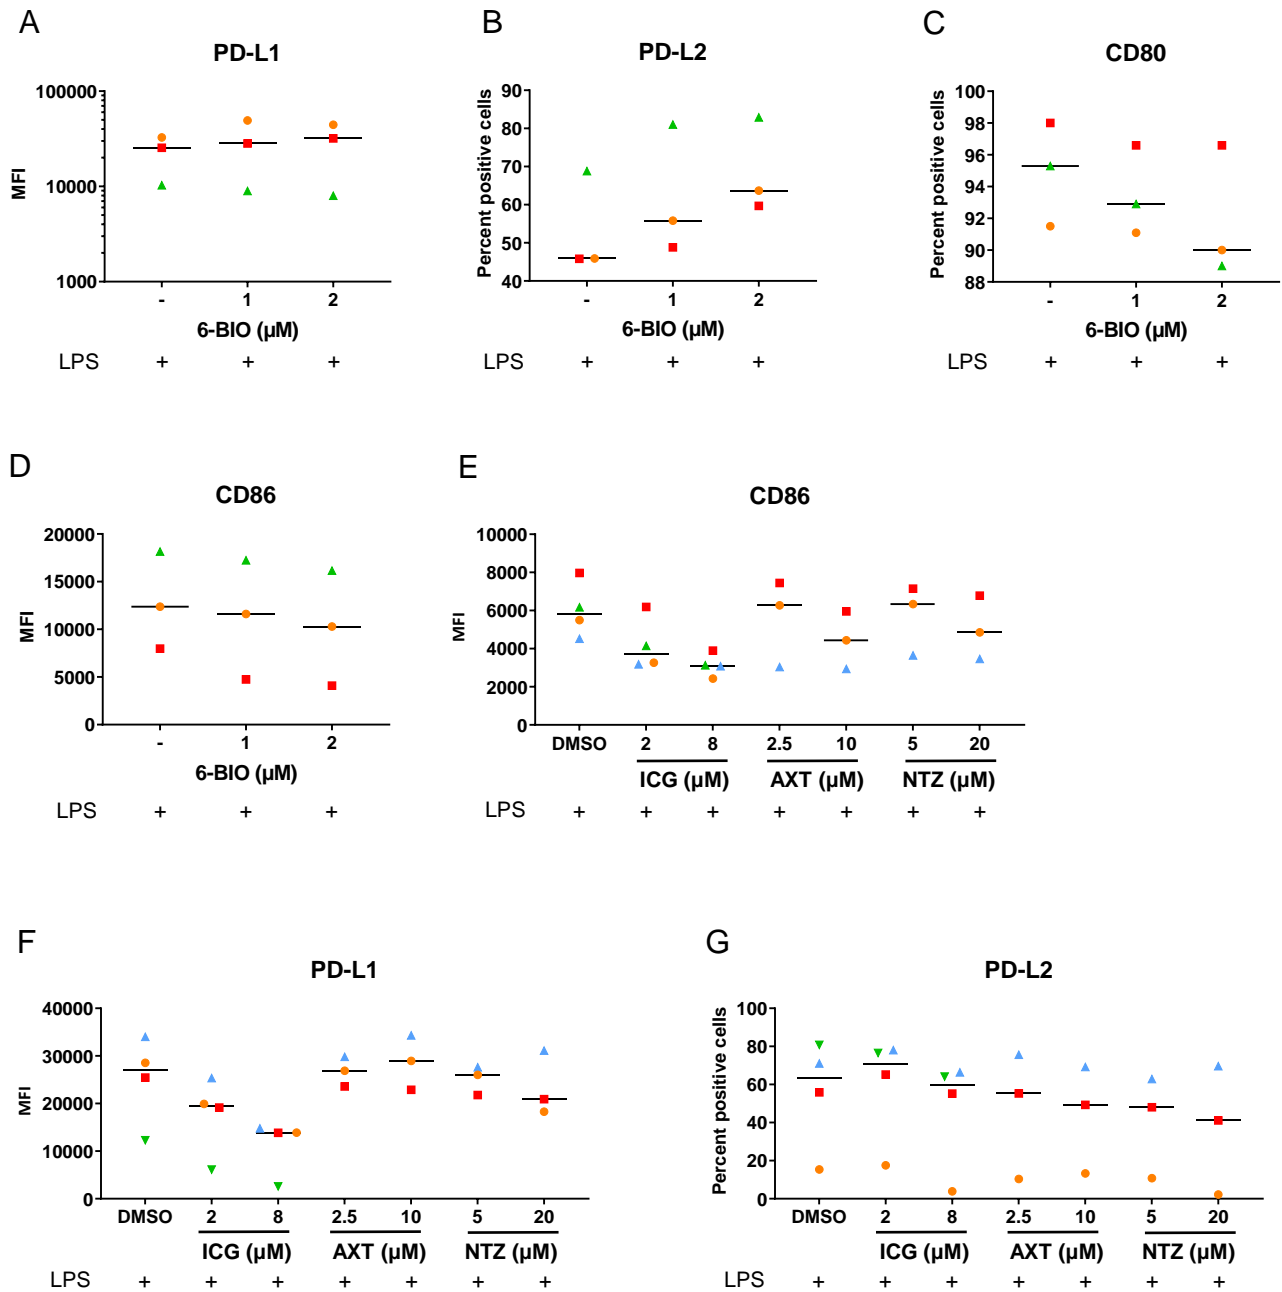

**Supplementary Figure 1.** moDCs obtained from healthy donors were treated with indicated concentration of 6-BIO or  $\beta$ -catenin inhibitors (type and concentrations as shown) for 24 hours. DMSO (vehicle) served as mature moDCs control and cells were treated with LPS for the last 23 hours. A - G) cell surface marker was measured with flow cytometry and shown as change of percentage of positive cells or median fluorescence intensity (MFI). Each symbol represents a different donor and lines represent the median.

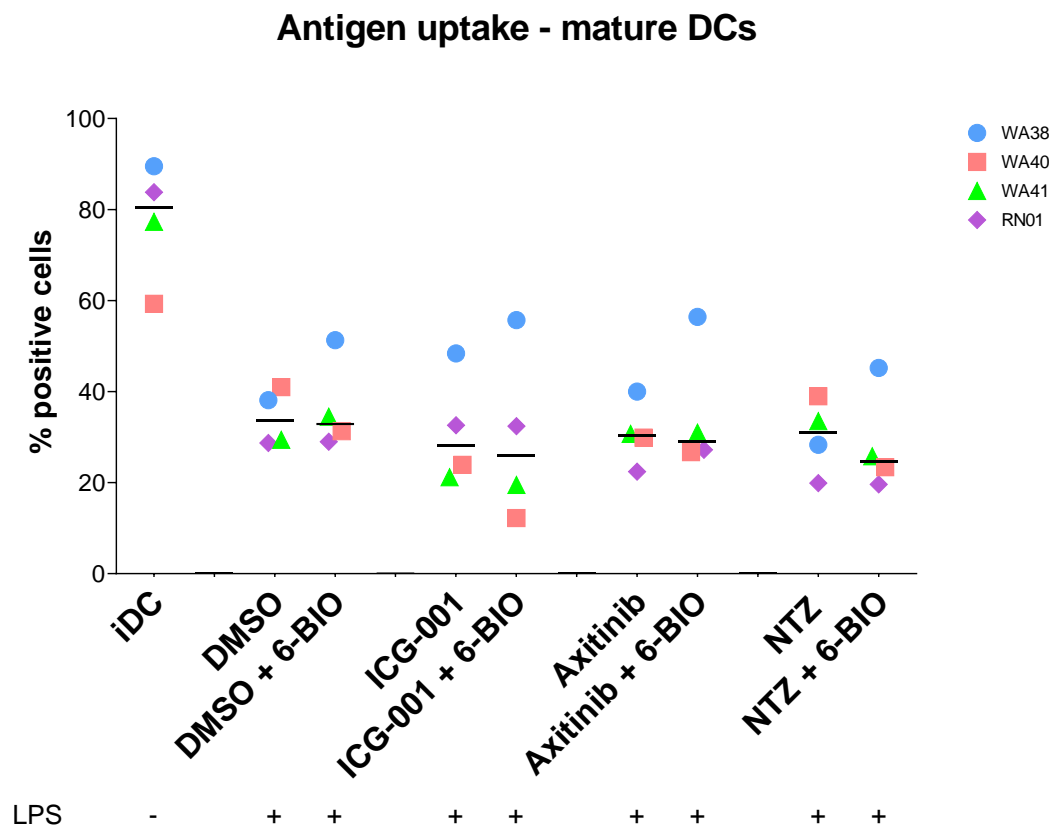

**Supplementary Figure 2. Antigen uptake assay.** moDCs obtained from healthy donors were treated with indicated  $\beta$ -catenin inhibitors (ICG-001 4  $\mu$ M, axitinib 10  $\mu$ M, nitazoxanide (NTZ) 10  $\mu$ M) with/without 6-BIO 0.5  $\mu$ M or DMSO (vehicle) for 24 hours. mature-DCs, treated with 100 ng/ml LPS for the last 23 hours except iDCs. 50,000 cells were incubated with FITC-dextran at 37°C. After 1 hour of incubation, cells were washed and analyzed immediately by flow cytometry. Each symbol represents a different donor and lines represent the median.

**A**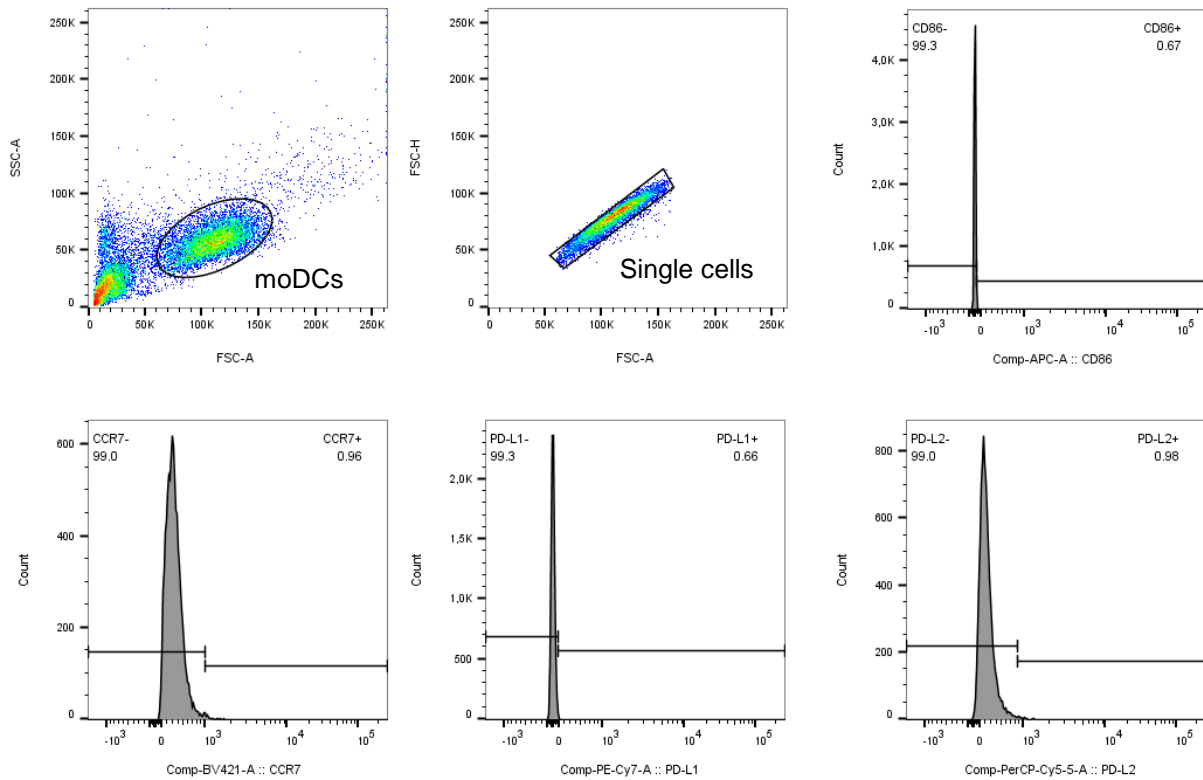**B**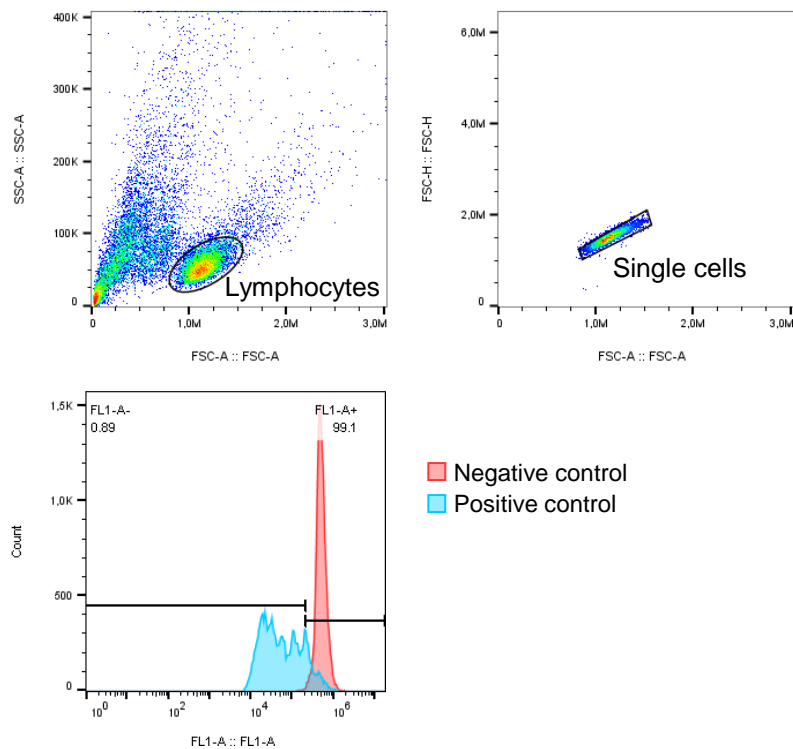

**Supplementary Figure 3. Representative gating strategy for flow cytometry analysis.** A) For moDCs surface markers, unstained samples were used to set the gates. B) For Mixed Leukocyte Reaction (MLR), negative controls were used to set the gates. 1% false-positive events were accepted throughout the analysis.

**Supplementary Table 1A. ELISA IL-12 p70 concentrations (values in pg/ml) for figure 2C.**

|                 | Donor<br>RB21<br>(pg/ml) | Donor<br>RB25<br>(pg/ml) | Donor<br>WA03<br>(pg/ml) | Donor<br>WA04<br>(pg/ml) | Donor<br>WA05<br>(pg/ml) |
|-----------------|--------------------------|--------------------------|--------------------------|--------------------------|--------------------------|
| DMSO            | 2395                     | 468                      | 1591                     | 14991                    | 19271                    |
| 6-BIO 1 $\mu$ M | 315                      | 364                      | 88                       | 27.406                   | 103                      |
| 6-BIO 2 $\mu$ M | 160                      | 56                       | 54.5                     | 5.864                    | 116                      |

**Supplementary Table 1B. ELISA IL-10 concentrations (values in pg/ml) for figure 2D.**

|                 | Donor<br>RB21<br>(pg/ml) | Donor<br>RB25<br>(pg/ml) | Donor<br>WA03<br>(pg/ml) | Donor<br>WA04<br>(pg/ml) | Donor<br>WA05<br>(pg/ml) |
|-----------------|--------------------------|--------------------------|--------------------------|--------------------------|--------------------------|
| DMSO            | 441                      | 26                       | 9246                     | 3353                     | 2744                     |
| 6-BIO 1 $\mu$ M | 1398                     | 182                      | 14889                    | 3340                     | 2524                     |
| 6-BIO 2 $\mu$ M | 917                      | 148                      | 11100                    | 2100                     | 2939                     |

**Supplementary Table 1C. ELISA IL-12 p70 concentrations (values in pg/ml) for figure 2E.**

|                      | Donor<br>RB32<br>(pg/ml) | Donor<br>RB33<br>(pg/ml) | Donor<br>RB34<br>(pg/ml) | Donor<br>WA03<br>(pg/ml) | Donor<br>WA04<br>(pg/ml) | Donor<br>WA05<br>(pg/ml) |
|----------------------|--------------------------|--------------------------|--------------------------|--------------------------|--------------------------|--------------------------|
| DMSO                 | 1528                     | 23000                    | 625                      | 1375                     | 14991                    | 19271                    |
| ICG-001 0.5 $\mu$ M  | 2195                     |                          |                          | 866                      | 15027.7                  | 15027                    |
| ICG-001 2 $\mu$ M    | 3760                     |                          |                          | 1516                     | 20578.87                 | 39790                    |
| ICG-001 8 $\mu$ M    | 13722                    |                          |                          | 6173                     | 49906.9                  | 45661                    |
| Axitinib 2.5 $\mu$ M | 1487                     | 46200                    | 2725                     |                          |                          |                          |
| Axitinib 5 $\mu$ M   | 3637                     | 46400                    | 1908                     |                          |                          |                          |
| Axitinib 10 $\mu$ M  | 3741                     | 24600                    | 2430                     |                          |                          |                          |
| NTZ 5 $\mu$ M        | 963                      | 15000                    | 821                      |                          |                          |                          |
| NTZ 10 $\mu$ M       | 1141                     | 12400                    | 905                      |                          |                          |                          |
| NTZ 20 $\mu$ M       | 627                      | 16000                    | 641                      |                          |                          |                          |

**Supplementary Table 1D. ELISA IL-10 concentrations (values in pg/ml) for figure 2F.**

|                      | Donor<br>RB32<br>(pg/ml) | Donor<br>RB33<br>(pg/ml) | Donor<br>RB34<br>(pg/ml) | Donor<br>WA03<br>(pg/ml) | Donor<br>WA04<br>(pg/ml) | Donor<br>WA05<br>(pg/ml) |
|----------------------|--------------------------|--------------------------|--------------------------|--------------------------|--------------------------|--------------------------|
| DMSO                 | 1219                     | 105                      | 712                      | 9246                     | 3353                     | 2782                     |
| ICG-001 0.5 $\mu$ M  | 516                      |                          |                          | 8746                     | 444                      | 1461                     |
| ICG-001 2 $\mu$ M    | 85                       |                          |                          | 4696                     | 129                      | 718                      |
| ICG-001 8 $\mu$ M    | 42                       |                          |                          | 1322                     | 74                       | 96                       |
| Axitinib 2.5 $\mu$ M | 677                      | 239                      | 1096                     |                          |                          |                          |
| Axitinib 5 $\mu$ M   | 1325                     | 155                      | 836                      |                          |                          |                          |
| Axitinib 10 $\mu$ M  | 1378                     | 25                       | 606                      |                          |                          |                          |
| NTZ 5 $\mu$ M        | 1076                     | 102                      | 625                      |                          |                          |                          |
| NTZ 10 $\mu$ M       | 323                      | 75                       | 751                      |                          |                          |                          |
| NTZ 20 $\mu$ M       | 139                      | 100                      | 686                      |                          |                          |                          |

**Supplementary Table 1E. ELISA IL-12 p70 concentrations (values in pg/ml) for figure 2G.**

|                     | Donor<br>WA31<br>(pg/ml) | Donor<br>WA32<br>(pg/ml) | Donor<br>WA33<br>(pg/ml) | Donor<br>WA34<br>(pg/ml) | Donor<br>WA51<br>(pg/ml) | Donor<br>WA53<br>(pg/ml) | Donor<br>WA54<br>(pg/ml) | Donor<br>WA55<br>(pg/ml) |
|---------------------|--------------------------|--------------------------|--------------------------|--------------------------|--------------------------|--------------------------|--------------------------|--------------------------|
| DMSO                | 3566.35                  | 402.15                   | 2115.37                  | 39225.6                  | 86.493                   | 298.75                   | 316.6                    | 105.45                   |
| 6-BIO 0.5 $\mu$ M   | 463.45                   | 5.32                     | 324.495                  | 1319.6                   | 30.995                   | 27.2                     | 36.35                    | 37.95                    |
| ICG-001 4 $\mu$ M   | 2492                     | 1573.83                  | 2226.135                 | 30483                    | 209.649                  | 245.05                   | 417.3                    | 136.45                   |
| ICG-001 + 6-BIO     | 1058.25                  | 91.82                    | 1126.36                  | 4566.6                   | 47.884                   | 43.45                    | 56.6                     | 50.1                     |
| Axitinib 10 $\mu$ M | 5766.05                  | 2926.61                  | 2450.59                  | 78156                    | 269.45                   | 244                      | 937.85                   | 753.2                    |
| Axitinib + 6-BIO    | 946.4                    | 266.56                   | 1961.06                  | 11215.4                  | 108.858                  | 49.95                    | 107.05                   | 114.8                    |
| NTZ 10 $\mu$ M      | 3842.85                  | 541.73                   | 2283.105                 | 21500.4                  | 29.825                   | 116.873                  | 259.15                   | 146.1                    |
| NTZ + 6-BIO         | 567.85                   | 5.48                     | 410.94                   | 977.7                    | 17.948                   | 8.822                    | 35.95                    | 55.25                    |
| XAV-939 10 $\mu$ M  | 1360.35                  | 187.45                   | 2492.875                 | 7125.7                   | 19.431                   | 19.418                   | 61.65                    | 58.05                    |
| XAV-939 + 6-BIO     | 577.3                    | 2.5                      | 358.1                    | 745.3                    | 27.293                   | 6.487                    | 56.9                     | 59.3                     |

**Supplementary Table 1F. ELISA IL-10 concentrations (values in pg/ml) for figure 2H.**

|                     | Donor<br>WA31<br>(pg/ml) | Donor<br>WA32<br>(pg/ml) | Donor<br>WA33<br>(pg/ml) | Donor<br>WA34<br>(pg/ml) | Donor<br>WA51<br>(pg/ml) | Donor<br>WA53<br>(pg/ml) | Donor<br>WA54<br>(pg/ml) | Donor<br>WA55<br>(pg/ml) | Donor<br>WA49<br>(pg/ml) |
|---------------------|--------------------------|--------------------------|--------------------------|--------------------------|--------------------------|--------------------------|--------------------------|--------------------------|--------------------------|
| DMSO                | 290.6                    | 362.65                   | 2568.325                 | 1711.7                   | 5.739                    | 379.3                    | 340.45                   | 167.95                   | 367.85                   |
| 6-BIO 0.5 $\mu$ M   | 1492.25                  | 856.65                   | 3762.15                  | 2523.55                  | 36.171                   | 761.5                    | 1019.8                   | 400.85                   | 366.25                   |
| ICG-001 4 $\mu$ M   | 59.65                    | 35.367                   | 402.15                   | 77.302                   | 4.045                    | 30.081                   | 48.65                    | 23.6                     | 142.35                   |
| ICG-001 + 6-BIO     | 277.8                    | 171.65                   | 1474.225                 | 303.232                  | 11.768                   | 96.952                   | 182.85                   | 73.7                     | 175.4                    |
| Axitinib 10 $\mu$ M | 159.8                    | 316.3                    | 2946.7                   | 3275.65                  | 4.865                    | 166.65                   | 213.35                   | 51.05                    | 152.55                   |
| Axitinib + 6-BIO    | 685.2                    | 1008.25                  | 6628.7                   | 3511.55                  | 15.616                   | 385.35                   | 576.8                    | 201.85                   | 139.3                    |
| NTZ 10 $\mu$ M      | 249.35                   | 599                      | 2838.7                   | 1358.2                   | 4.858                    | 202.5                    | 315.75                   | 125.55                   | 434.15                   |
| NTZ + 6-BIO         | 509.55                   | 1064.7                   | 4798.475                 | 2040.3                   | 27.82                    | 490.4                    | 875.85                   | 309.95                   | 400.15                   |
| XAV-939 10 $\mu$ M  | 462.9                    | 655.2                    | 2525.8                   | 795.2                    | 19.47                    | 428.7                    | 637.8                    | 167.05                   | 393.8                    |
| XAV-939 + 6-BIO     | 899.9                    | 1049.6                   | 4380.125                 | 2160.25                  | 32.397                   | 647.8                    | 935.45                   | 276.6                    | 398.52                   |

**Supplementary Table 2. GO term enrichment analysis for differentially expressed genes of the comparison mDC + 6-BIO vs. mDC + DMSO (for up-regulated genes only).** The table shows GO identifiers in combination with GO terms, as well as the number of annotated genes in the GO term gene set (Annot.).

| <i>GO ID</i> | <i>GO Term</i>                                 | <i>Annot.</i> | <i>S</i> | <i>Expect.</i> | <i>Fisher</i> |
|--------------|------------------------------------------------|---------------|----------|----------------|---------------|
| GO:0050896   | response to stimulus                           | 6449          | 210      | 154.9200       | 4.6000e-11    |
| GO:0032501   | multicellular organismal process               | 5014          | 172      | 120.4500       | 9.1800e-10    |
| GO:0016477   | cell migration                                 | 1144          | 60       | 27.4800        | 4.4420e-09    |
| GO:0042221   | response to chemical                           | 3288          | 123      | 78.9900        | 1.6098e-08    |
| GO:0048870   | cell motility                                  | 1247          | 62       | 29.9600        | 1.7896e-08    |
| GO:0051674   | localization of cell                           | 1247          | 62       | 29.9600        | 1.7896e-08    |
| GO:0023052   | signaling                                      | 4532          | 155      | 108.8700       | 2.7086e-08    |
| GO:0040011   | locomotion                                     | 1368          | 65       | 32.8600        | 4.2858e-08    |
| GO:0007154   | cell communication                             | 4560          | 155      | 109.5500       | 4.3151e-08    |
| GO:0006928   | movement of cell or subcellular<br>componen... | 1577          | 71       | 37.8800        | 7.6166e-08    |
| GO:0051271   | negative regulation of cellular<br>componen... | 249           | 22       | 5.9800         | 1.4358e-07    |
| GO:0051239   | regulation of multicellular organismal p...    | 2371          | 94       | 56.9600        | 1.5107e-07    |
| GO:0048513   | animal organ development                       | 2476          | 97       | 59.4800        | 1.5403e-07    |
| GO:0040012   | regulation of locomotion                       | 767           | 43       | 18.4300        | 1.5964e-07    |
| GO:0030855   | epithelial cell differentiation                | 432           | 30       | 10.3800        | 1.7264e-07    |
| GO:2000145   | regulation of cell motility                    | 742           | 42       | 17.8300        | 1.7445e-07    |
| GO:0030336   | negative regulation of cell migration          | 215           | 20       | 5.1600         | 2.3455e-07    |
| GO:0007186   | G protein-coupled receptor signaling<br>pat... | 538           | 34       | 12.9200        | 2.3713e-07    |
| GO:0030334   | regulation of cell migration                   | 702           | 40       | 16.8600        | 2.9872e-07    |
| GO:0001944   | vasculature development                        | 551           | 34       | 13.2400        | 4.1402e-07    |
| GO:0072358   | cardiovascular system development              | 551           | 34       | 13.2400        | 4.1402e-07    |

**Supplementary Table 3. GO term enrichment analysis for differentially expressed genes of the comparison mDC + 6-BIO vs. mDC + DMSO (for down-regulated genes only).** The table shows GO identifiers in combination with GO terms, as well as the number of annotated genes in the GO term gene set (Annot.).

| <i>GO ID</i> | <i>GO Term</i>                              | <i>Annot.</i> | <i>S</i> | <i>Expect.</i> | <i>Fisher</i> |
|--------------|---------------------------------------------|---------------|----------|----------------|---------------|
| GO:0051716   | cellular response to stimulus               | 5389          | 120      | 84.5800        | 3.3000e-07    |
| GO:0070887   | cellular response to chemical stimulus      | 2544          | 69       | 39.9300        | 1.0400e-06    |
| GO:0048518   | positive regulation of biological proces... | 4785          | 108      | 75.1000        | 1.6200e-06    |
| GO:1901700   | response to oxygen-containing compound      | 1276          | 42       | 20.0300        | 2.7700e-06    |
| GO:0051480   | regulation of cytosolic calcium ion conc... | 226           | 15       | 3.5500         | 2.8900e-06    |
| GO:0071310   | cellular response to organic substance      | 2100          | 59       | 32.9600        | 3.0300e-06    |
| GO:0007154   | cell communication                          | 4560          | 103      | 71.5700        | 3.8800e-06    |
| GO:0023052   | signaling                                   | 4532          | 102      | 71.1300        | 5.5400e-06    |
| GO:0007204   | positive regulation of cytosolic calcium... | 209           | 14       | 3.2800         | 5.6200e-06    |
| GO:0035556   | intracellular signal transduction           | 2258          | 61       | 35.4400        | 7.0000e-06    |
| GO:1901701   | cellular response to oxygen-containing c... | 922           | 33       | 14.4700        | 7.1200e-06    |
| GO:0048522   | positive regulation of cellular process     | 4388          | 98       | 68.8700        | 1.5560e-05    |
| GO:0010033   | response to organic substance               | 2533          | 65       | 39.7600        | 1.7160e-05    |
| GO:0050794   | regulation of cellular process              | 8051          | 154      | 126.3600       | 1.9100e-05    |
| GO:0042832   | defense response to protozoan               | 22            | 5        | 0.3500         | 1.9660e-05    |
| GO:0034097   | response to cytokine                        | 1017          | 34       | 15.9600        | 2.1510e-05    |
| GO:0001562   | response to protozoan                       | 23            | 5        | 0.3600         | 2.4800e-05    |
| GO:0071345   | cellular response to cytokine stimulus      | 941           | 32       | 14.7700        | 2.7940e-05    |
| GO:0050896   | response to stimulus                        | 6449          | 130      | 101.2200       | 2.8210e-05    |
| GO:0042221   | response to chemical                        | 3288          | 78       | 51.6100        | 2.9130e-05    |

**Supplementary Table 4. GO term enrichment analysis for differentially expressed genes of the comparison mDC + ICG-001 vs. mDC + DMSO (for up-regulated genes only).** The table shows GO identifiers in combination with GO terms, as well as the number of annotated genes in the GO term gene set (Annot.).

| <i>GO ID</i> | <i>GO Term</i>                              | <i>Annot.</i> | <i>S</i> | <i>Expect.</i> | <i>Fisher</i> |
|--------------|---------------------------------------------|---------------|----------|----------------|---------------|
| GO:1901607   | alpha-amino acid biosynthetic process       | 56            | 5        | 0.1400         | 2.8000e-07    |
| GO:0008652   | cellular amino acid biosynthetic process    | 68            | 5        | 0.1700         | 7.4000e-07    |
| GO:0006563   | L-serine metabolic process                  | 11            | 3        | 0.0300         | 2.4900e-06    |
| GO:0009070   | serine family amino acid biosynthetic pr... | 15            | 3        | 0.0400         | 6.8100e-06    |
| GO:0017144   | drug metabolic process                      | 446           | 8        | 1.1400         | 1.2280e-05    |
| GO:0071549   | cellular response to dexamethasone stimu... | 24            | 3        | 0.0600         | 2.9820e-05    |
| GO:1901605   | alpha-amino acid metabolic process          | 152           | 5        | 0.3900         | 3.8630e-05    |
| GO:0097327   | response to antineoplastic agent            | 80            | 4        | 0.2000         | 4.8990e-05    |
| GO:0046394   | carboxylic acid biosynthetic process        | 270           | 6        | 0.6900         | 5.4570e-05    |
| GO:0016053   | organic acid biosynthetic process           | 271           | 6        | 0.6900         | 5.5700e-05    |
| GO:0009069   | serine family amino acid metabolic proce... | 30            | 3        | 0.0800         | 5.9200e-05    |
| GO:0071548   | response to dexamethasone                   | 31            | 3        | 0.0800         | 6.5430e-05    |
| GO:0044283   | small molecule biosynthetic process         | 569           | 8        | 1.4600         | 7.0430e-05    |
| GO:0009066   | aspartate family amino acid metabolic pr... | 38            | 3        | 0.1000         | 1.2000e-04    |
| GO:0071385   | cellular response to glucocorticoid stim... | 42            | 3        | 0.1100         | 1.6000e-04    |
| GO:0071384   | cellular response to corticosteroid stim... | 44            | 3        | 0.1100         | 1.9000e-04    |
| GO:0071466   | cellular response to xenobiotic stimulus    | 117           | 4        | 0.3000         | 2.1000e-04    |
| GO:0044282   | small molecule catabolic process            | 366           | 6        | 0.9400         | 2.9000e-04    |
| GO:0009064   | glutamine family amino acid metabolic pr... | 53            | 3        | 0.1400         | 3.3000e-04    |
| GO:0042446   | hormone biosynthetic process                | 54            | 3        | 0.1400         | 3.5000e-04    |



**Supplementary Table 5. GO term enrichment analysis for differentially expressed genes of the comparison mDC + ICG-001 vs. mDC + DMSO (for down-regulated genes only).** The table shows GO identifiers in combination with GO terms, as well as the number of annotated genes in the GO term gene set (Annot.).

| <i>GO ID</i> | <i>GO Term</i>                                 | <i>Annot.</i> | <i>S</i> | <i>Expect.</i> | <i>Fisher</i> |
|--------------|------------------------------------------------|---------------|----------|----------------|---------------|
| GO:0019730   | antimicrobial humoral response                 | 55            | 8        | 0.1400         | 6.1000e-13    |
| GO:0006952   | defense response                               | 1265          | 19       | 3.1400         | 4.8300e-12    |
| GO:0006954   | inflammatory response                          | 601           | 14       | 1.4900         | 3.8240e-11    |
| GO:0030593   | neutrophil chemotaxis                          | 91            | 8        | 0.2300         | 3.9970e-11    |
| GO:0061844   | antimicrobial humoral immune response<br>me... | 29            | 6        | 0.0700         | 6.3900e-11    |
| GO:0071621   | granulocyte chemotaxis                         | 105           | 8        | 0.2600         | 1.2813e-10    |
| GO:1990266   | neutrophil migration                           | 105           | 8        | 0.2600         | 1.2813e-10    |
| GO:0032101   | regulation of response to external stimu...    | 819           | 15       | 2.0300         | 1.7575e-10    |
| GO:0009605   | response to external stimulus                  | 2094          | 21       | 5.2000         | 3.7610e-10    |
| GO:0097530   | granulocyte migration                          | 122           | 8        | 0.3000         | 4.3026e-10    |
| GO:0006955   | immune response                                | 1644          | 19       | 4.0800         | 4.9131e-10    |
| GO:0006959   | humoral immune response                        | 147           | 8        | 0.3600         | 1.9102e-09    |
| GO:0006950   | response to stress                             | 3236          | 24       | 8.0300         | 2.8453e-09    |
| GO:0002376   | immune system process                          | 2414          | 21       | 5.9900         | 5.6275e-09    |
| GO:0097529   | myeloid leukocyte migration                    | 182           | 8        | 0.4500         | 1.0337e-08    |
| GO:0051707   | response to other organism                     | 1123          | 15       | 2.7900         | 1.4005e-08    |
| GO:0043207   | response to external biotic stimulus           | 1124          | 15       | 2.7900         | 1.4176e-08    |
| GO:0030595   | leukocyte chemotaxis                           | 193           | 8        | 0.4800         | 1.6380e-08    |
| GO:0009607   | response to biotic stimulus                    | 1151          | 15       | 2.8600         | 1.9581e-08    |
| GO:0098542   | defense response to other organism             | 853           | 13       | 2.1200         | 4.1847e-08    |

**Supplementary Table 6. Genes effected by ICG-001 treatment and their representation in the dataset.** Genes were manually selected based on the references shown. Statistical values for the comparison of LPS-matured DC + ICG-001 vs. LPS-matured DC + DMSO are shown.

| <i>HGNC symbol</i> | <i>Ensembl ID</i> | <i>log2FC</i> | <i>p-value</i> | <i>adj. p-value</i> | <i>Reference</i>                       |
|--------------------|-------------------|---------------|----------------|---------------------|----------------------------------------|
| BIRC5              | ENSG00000089685   | -0.7157       | 0.7074         | 1                   | Emami et al. 2004;<br>Chan et al. 2015 |
| CCND1              | ENSG00000110092   | 0.8013        | 0.5697         | 1                   | Emami et al. 2004                      |
| CD44               | ENSG00000026508   | -0.1965       | 1.0000         | 1                   | Chan et al. 2015                       |
| CDH1               | ENSG00000039068   | 0.1363        | 1.0000         | 1                   | Chan et al. 2015                       |
| EZH2               | ENSG00000106462   | -0.1493       | 1.0000         | 1                   | Chan et al. 2015                       |
| FOXM1              | ENSG00000111206   | -0.3174       | 1.0000         | 1                   | Chan et al. 2015                       |
| S100A4             | ENSG00000196154   | -1.1493       | 0.0372         | 1                   | Emami et al. 2004                      |
| VIM                | ENSG00000026025   | -0.4712       | 1.0000         | 1                   | Chan et al. 2015                       |
